# Supplementary material for: A ligand-free solid-supported system for Sonogashira couplings: applications in nucleoside chemistry
Source: Royal Society of Chemistry journal article supplement (doi:10.1039/b505737j), 2005-01-01
Supplement: b505737j.pdf [file b505737j.pdf]

## A Ligand-Free Solid-Supported System for Sonogashira Couplings: Applications in Nucleoside Chemistry

Neil K. Garg, Carolyn C. Woodroffe, Christopher J. Lacenere,  
Stephen R. Quake\*, and Brian M. Stoltz\*

*The Arnold and Mabel Beckman Laboratories of Chemical Synthesis, Division of Chemistry and  
Chemical Engineering, California Institute of Technology, Pasadena, California 91125, USA*

### Electronic Supplementary Information (ESI) for Chemical Communications

**Materials and Methods.** All commercially obtained reagents were used as received. Amberlite IRA-67, 10% palladium on charcoal, and CuI were obtained from Aldrich Chemical Company, Inc. DMF (DriSolv) was purchased from EMD Chemicals, Inc. Nucleoside substrates were obtained from Berry & Associates or Sigma. *N*-propargylphthalimide was purchased from GFS Chemicals, Inc. and *N*-propargyltrifluoroacetamide (**5**) was prepared following a literature protocol.<sup>1</sup> Reaction temperatures were controlled using an IKA Mag temperature modulator. Thin-layer chromatography (TLC) was conducted with E. Merck silica gel 60 F254 pre-coated plates, (0.25 mm) and visualized using a combination of UV, anisaldehyde, ceric ammonium molybdate, and potassium permanganate staining. ICN silica gel (particle size 0.032-0.063 mm) was used for flash column chromatography. <sup>1</sup>H NMR spectra were recorded on a Varian Mercury 300 (at 300 MHz) and are reported relative to Me<sub>4</sub>Si (δ 0.0). Data for <sup>1</sup>H NMR spectra are reported as follows: chemical shift (δ ppm), multiplicity, coupling constant (Hz) and integration.

**Representative Procedure for Resin-Based Sonogashira Coupling (Table 1, Entry 7 is used as an example):**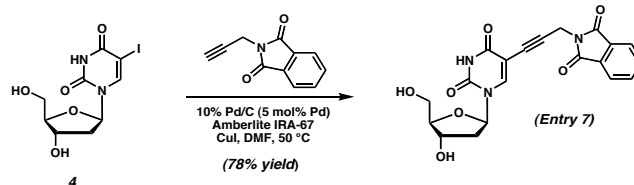

A reaction tube was charged with 5-iodo-2'-deoxyuridine (**4**, 88.5 mg, 0.25 mmol), 10% palladium on charcoal (13.5 mg, 0.0125 mmol), CuI (9.5 mg, 0.05 mmol), *N*-propargylphthalimide (93 mg, 0.5 mmol), Amberlite IRA-67 (223 mg), and DMF (2.5 mL). The reaction mixture was sparged with argon for 2 min, and then capped with a rubber septum. The reaction vessel was evacuated and backfilled with N<sub>2</sub> (2x), sealed, then placed in a 50 °C oil bath. After 14 h, the reaction mixture was cooled to 23 °C, and filtered over a plug of SiO<sub>2</sub> topped with celite (5:1 CH<sub>2</sub>Cl<sub>2</sub>:MeOH eluent). After removal of solvents at reduced pressure with gentle heating (approximately 35 °C), the crude product was purified by flash chromatography (7:1 CH<sub>2</sub>Cl<sub>2</sub>:MeOH eluent) to afford the Sonogashira product (80.4 mg, 78% yield).

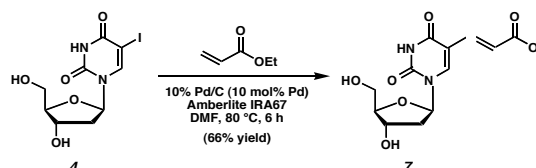

**Heck Product 7.** A reaction tube was charged with 5-iodo-2'-deoxyuridine (**4**, 88.5 mg, 0.25 mmol), 10% palladium on charcoal (27.0 mg, 0.025 mmol), Amberlite IRA-67 (223 mg), and DMF (2.5 mL). The reaction mixture was sparged with argon for 1 min, and then capped with a rubber septum. The reaction vessel was evacuated and backfilled with N<sub>2</sub> (2x), then ethyl acrylate (80 mL, 0.75 mmol) was added. The reaction tube was sealed and placed in a 50 °C oil bath. After 6 h, the reaction mixture was cooled to 23 °C, and filtered over a plug of SiO<sub>2</sub> topped with celite (5:1 CH<sub>2</sub>Cl<sub>2</sub>:MeOH eluent). After removal of solvents at reduced pressure with gentle heating (approximately 35 °C), the crude product was purified by flash chromatography (7:1 CH<sub>2</sub>Cl<sub>2</sub>:MeOH eluent) to afford the Heck product **7** (53.8 mg, 66% yield).

• <sup>1</sup>H NMR spectra for all compounds have been included below.<sup>2</sup>

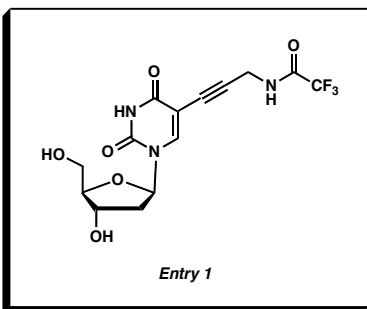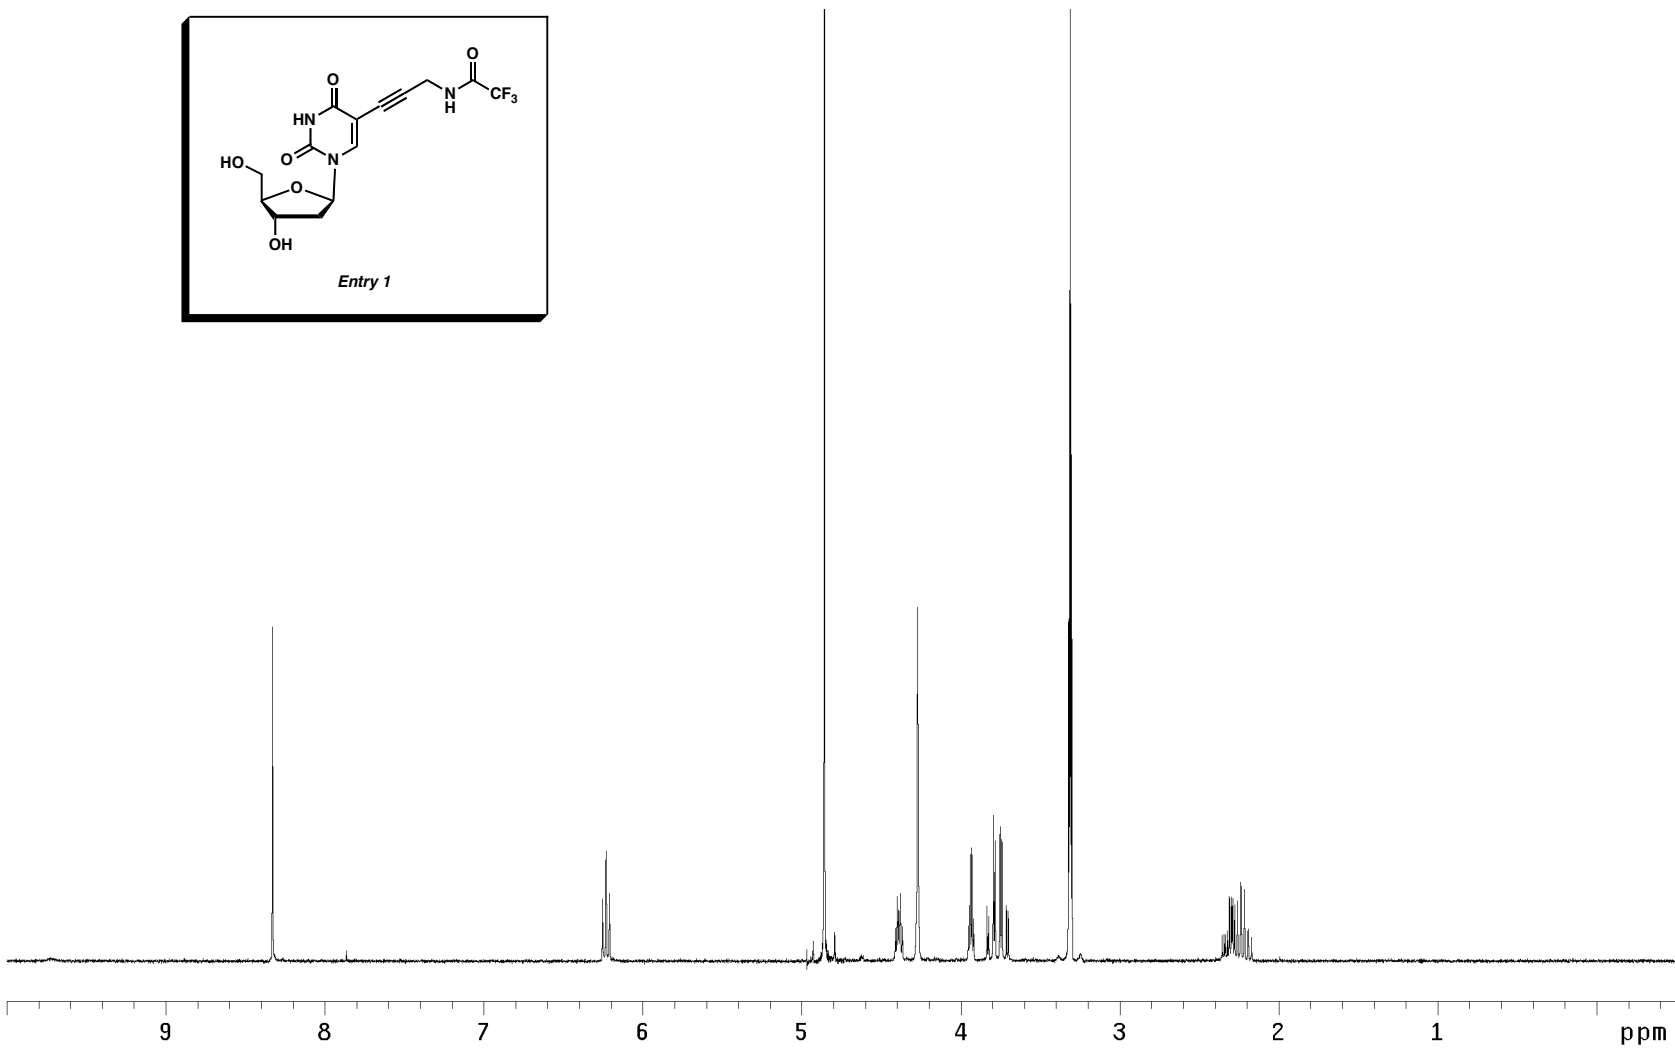

Figure SI.1 <sup>1</sup>H NMR (300 MHz, CD<sub>3</sub>OD) of Entry 1.<sup>2a,b,c,d</sup>

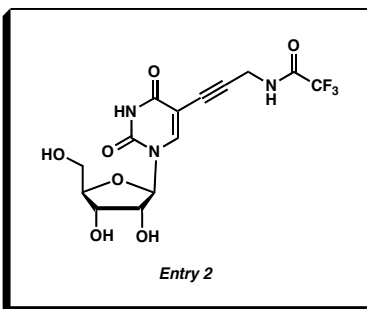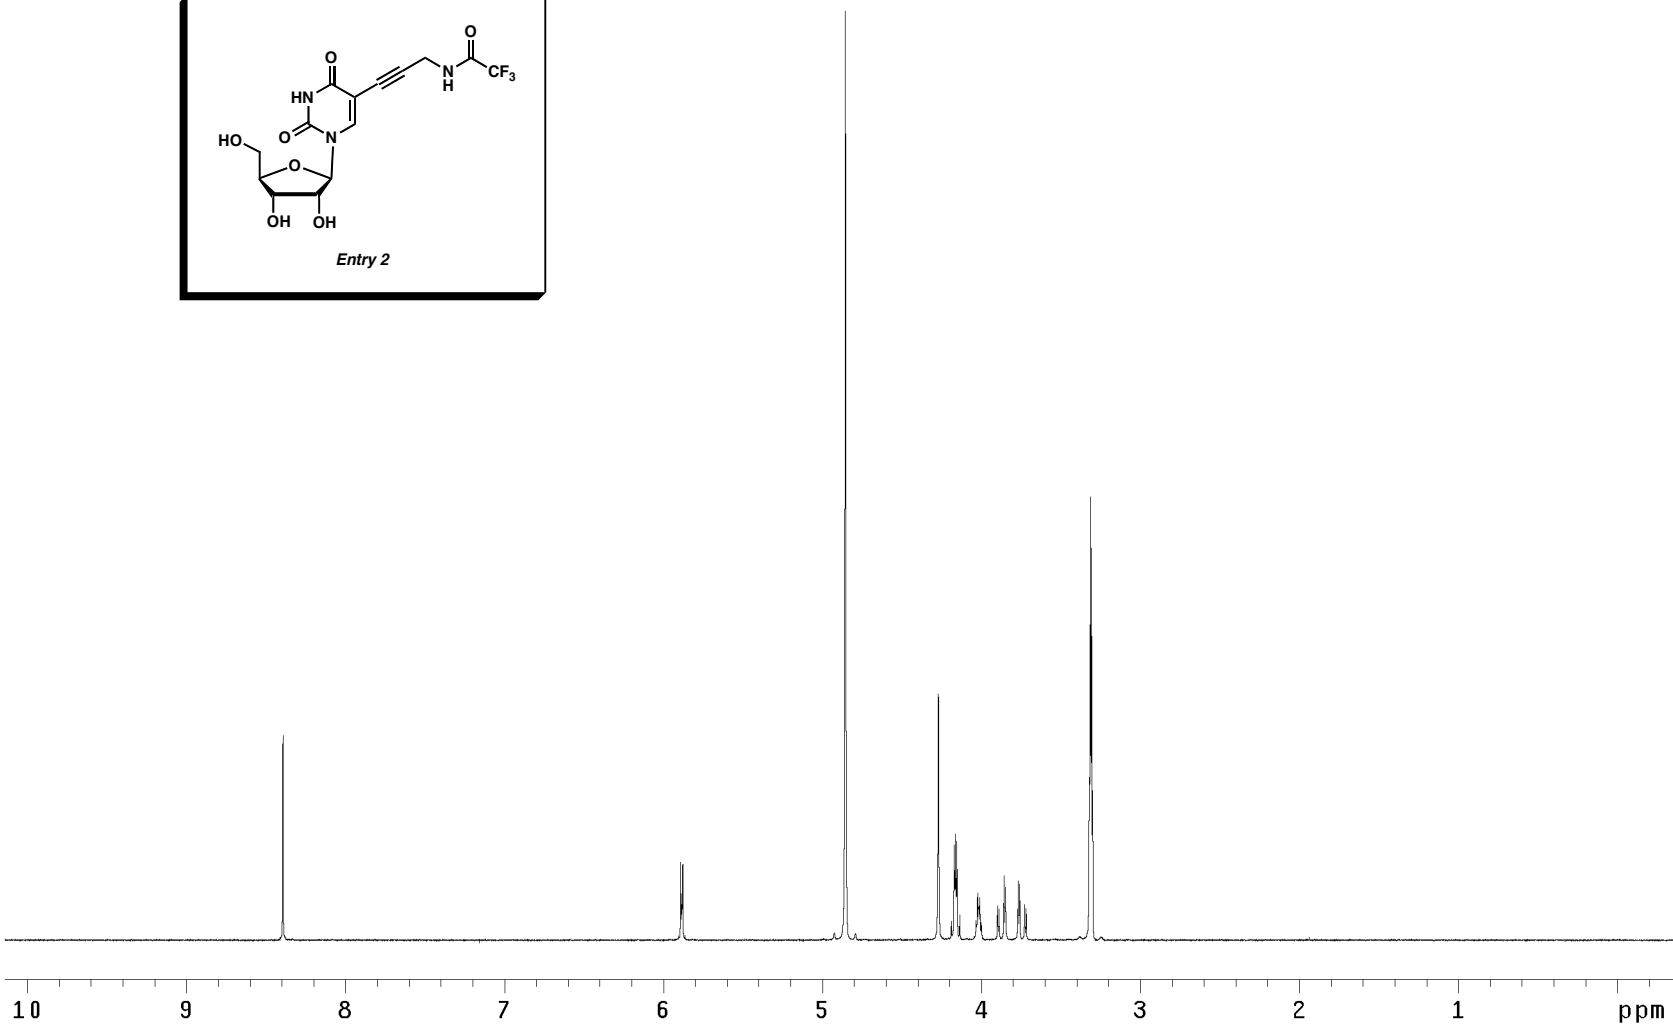

Figure SI.2 <sup>1</sup>H NMR (300 MHz, CD<sub>3</sub>OD) of Entry 2.<sup>2a,e,f</sup>

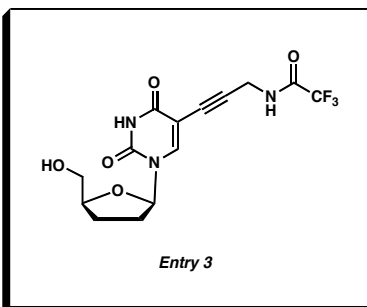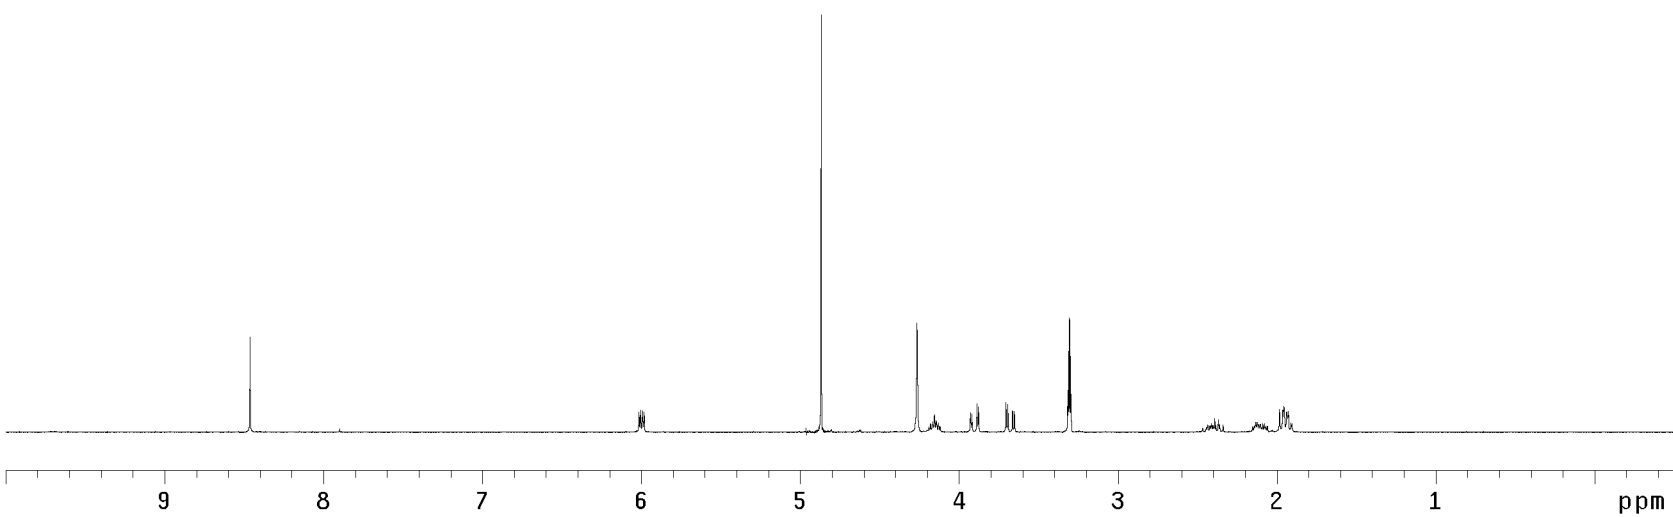

Figure SI.3 <sup>1</sup>H NMR (300 MHz, CD<sub>3</sub>OD) of Entry 3.<sup>2a,g,h,i</sup>

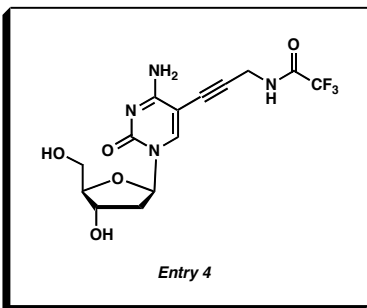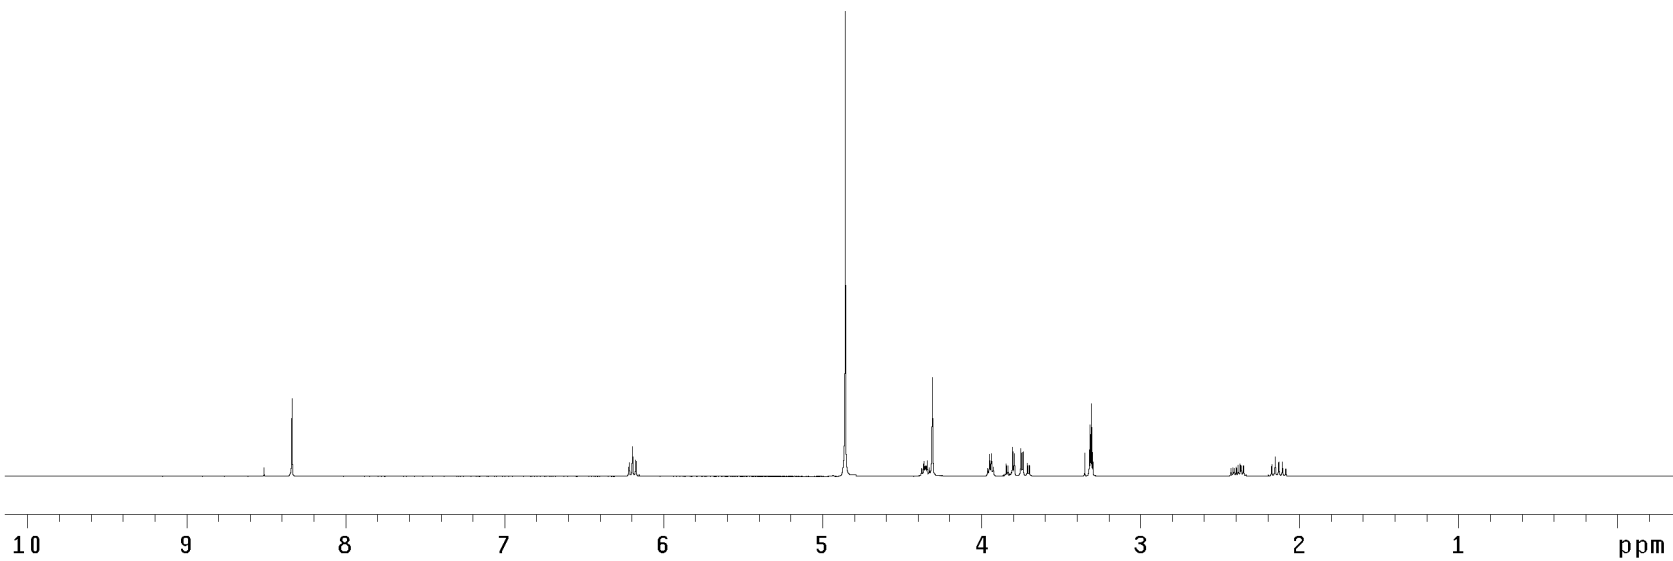

Figure SI.4 <sup>1</sup>H NMR (300 MHz, CD<sub>3</sub>OD) of Entry 4.<sup>2a,d</sup>

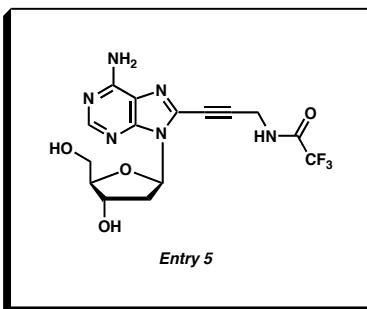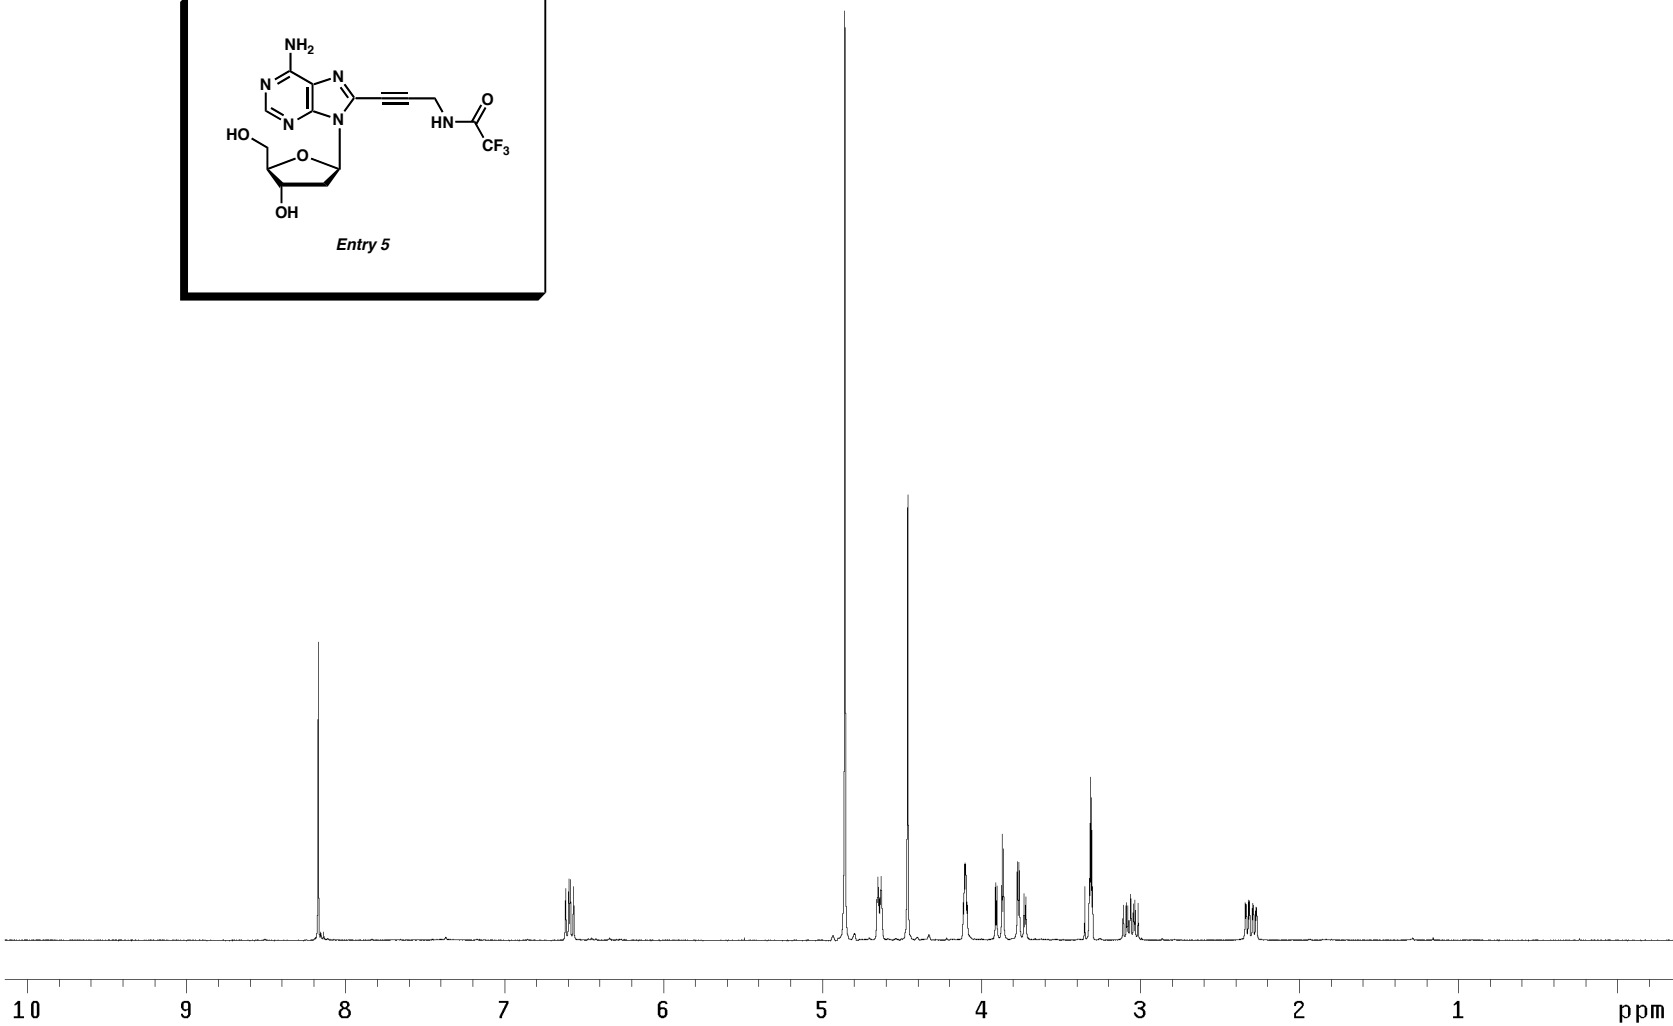

Figure SI.5 <sup>1</sup>H NMR (300 MHz, CD<sub>3</sub>OD) of Entry 5.

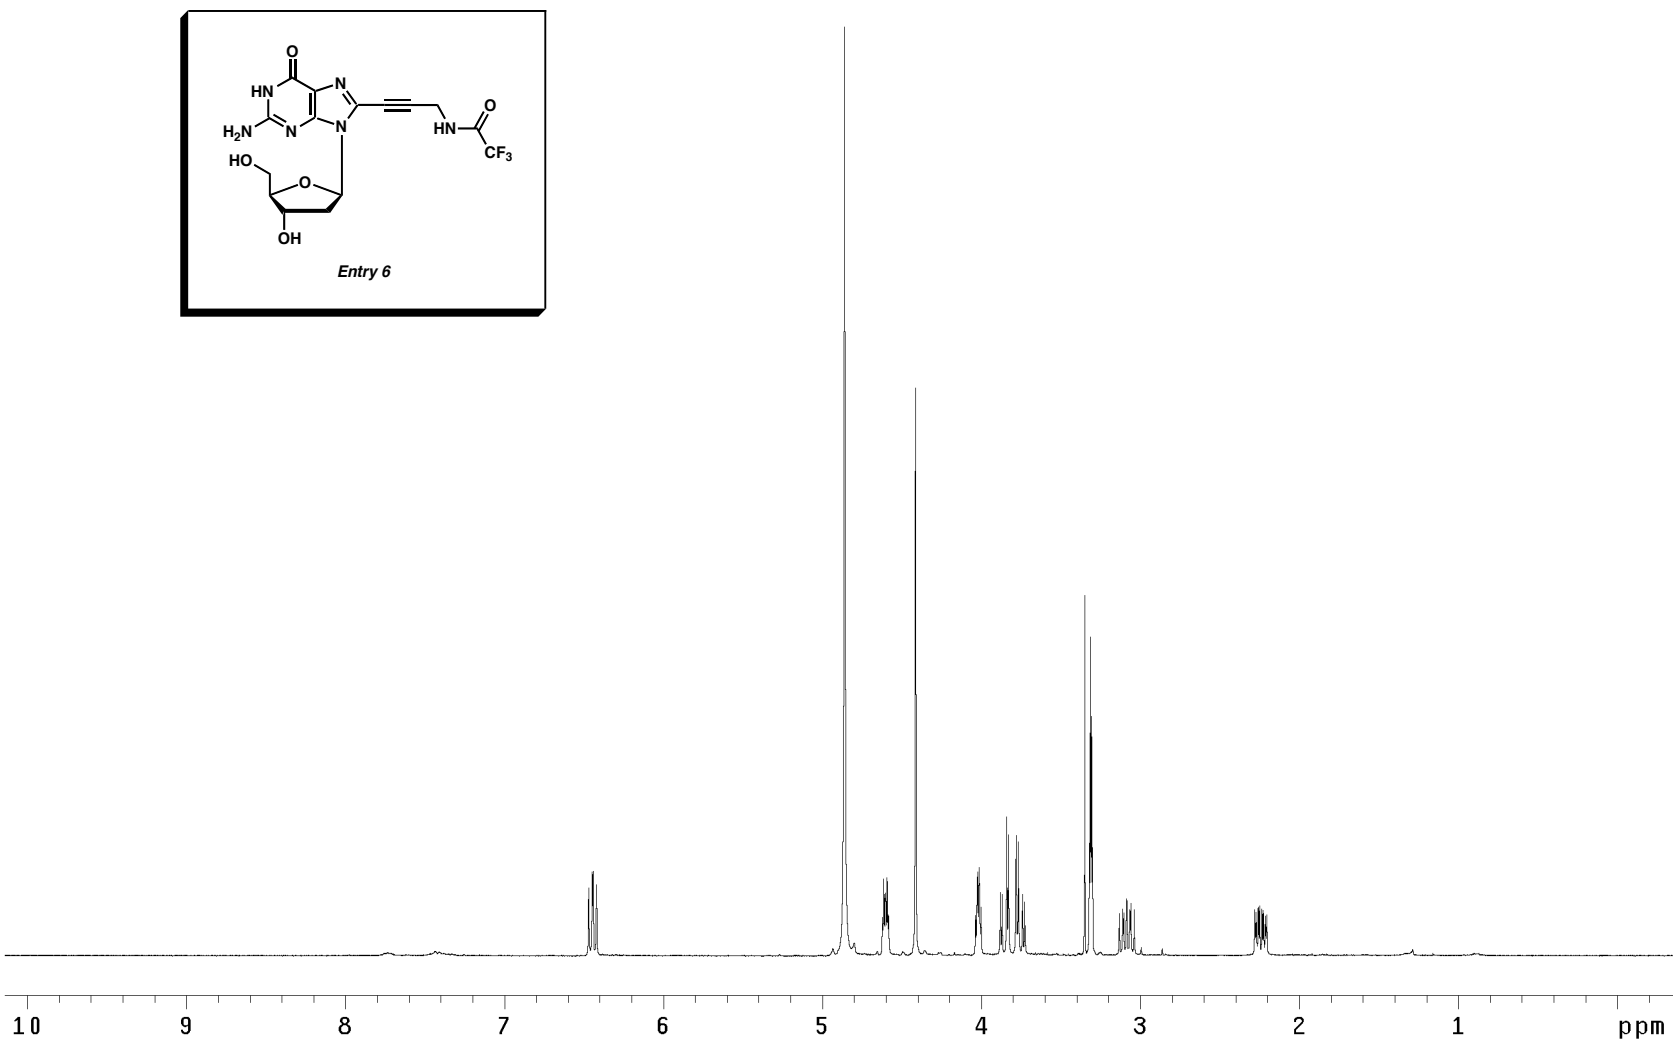

Figure SI.6 <sup>1</sup>H NMR (300 MHz, CD<sub>3</sub>OD) of Entry 6.



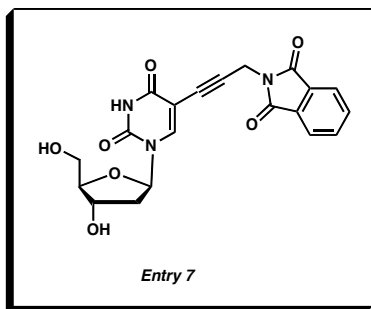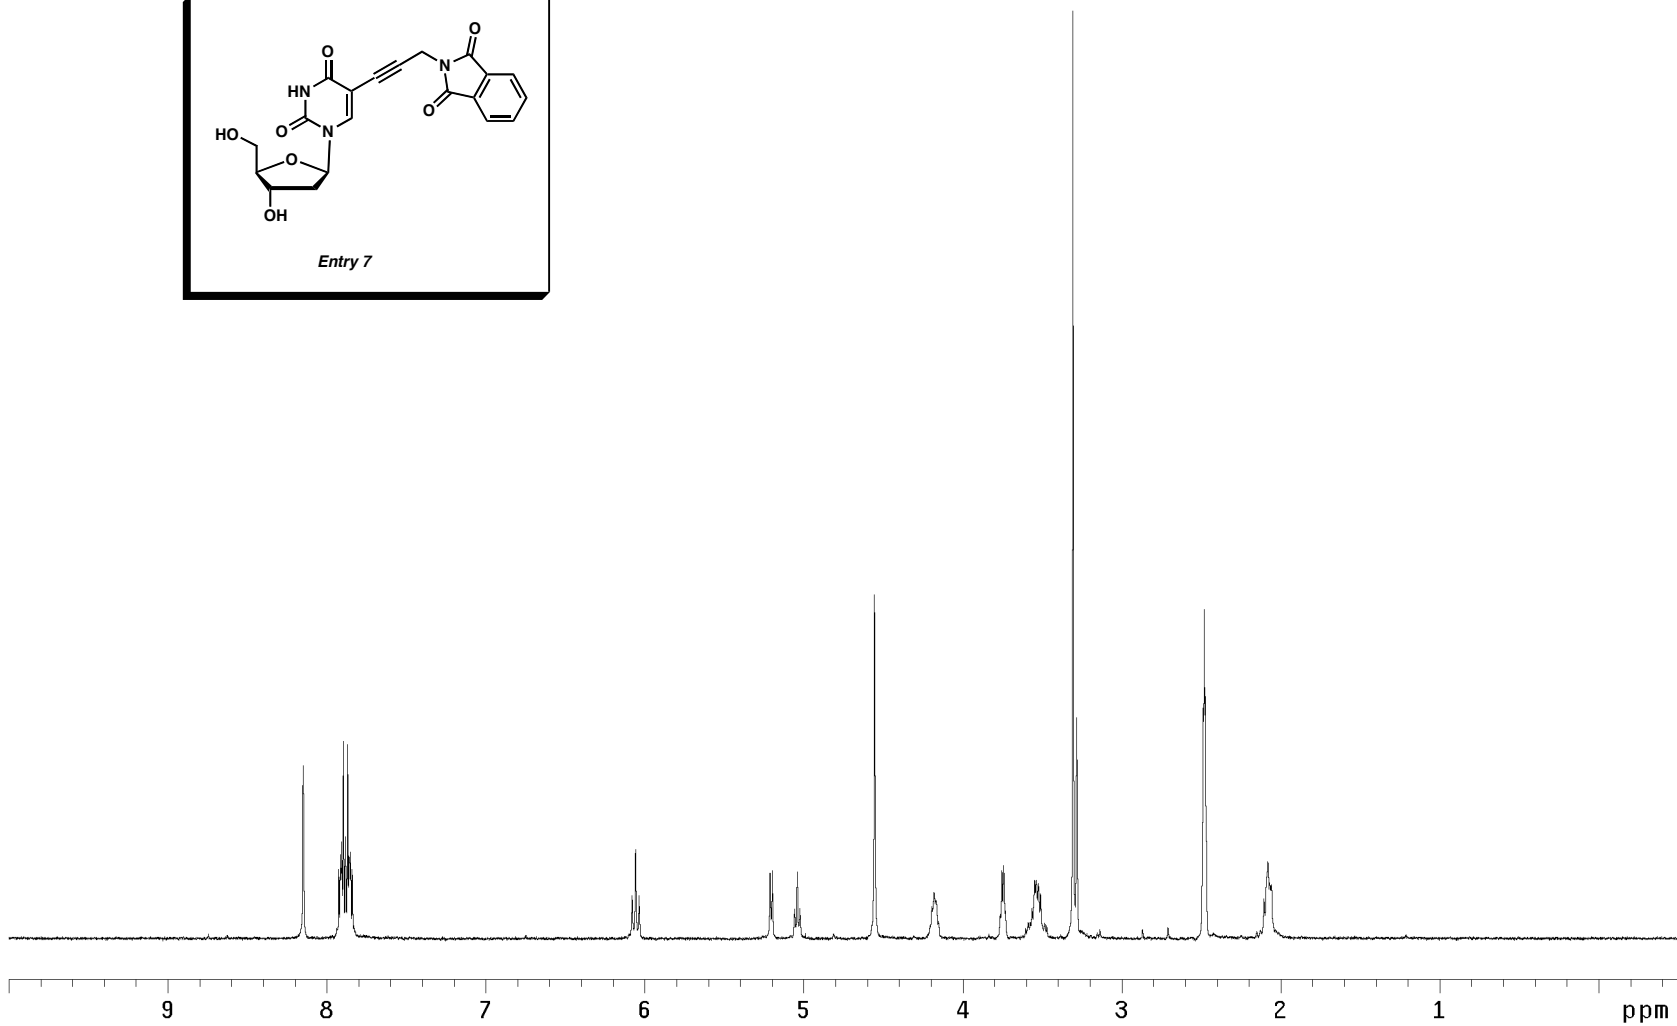

Figure SI.7  $^1\text{H}$  NMR (300 MHz, DMSO- $d_6$ ) of Entry 7.<sup>2j,k</sup>

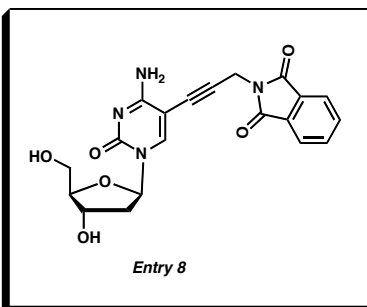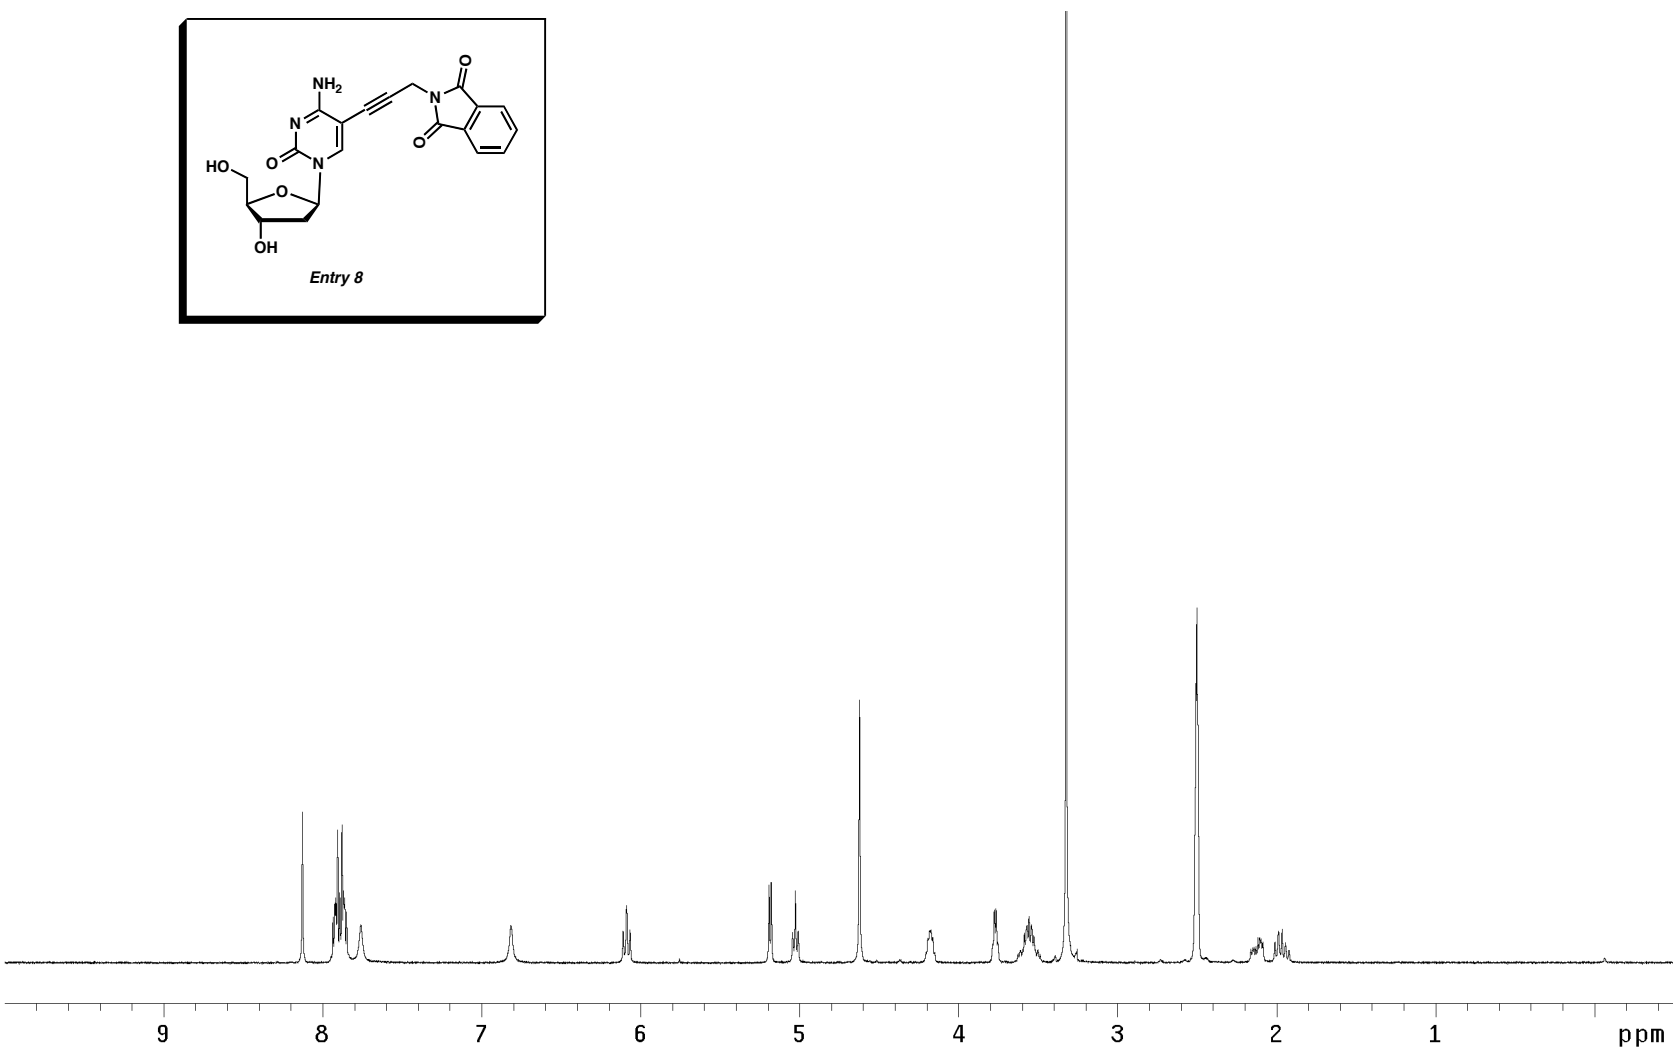

Figure SI.8  $^1\text{H}$  NMR (300 MHz, DMSO- $d_6$ ) of Entry 8.<sup>21</sup>

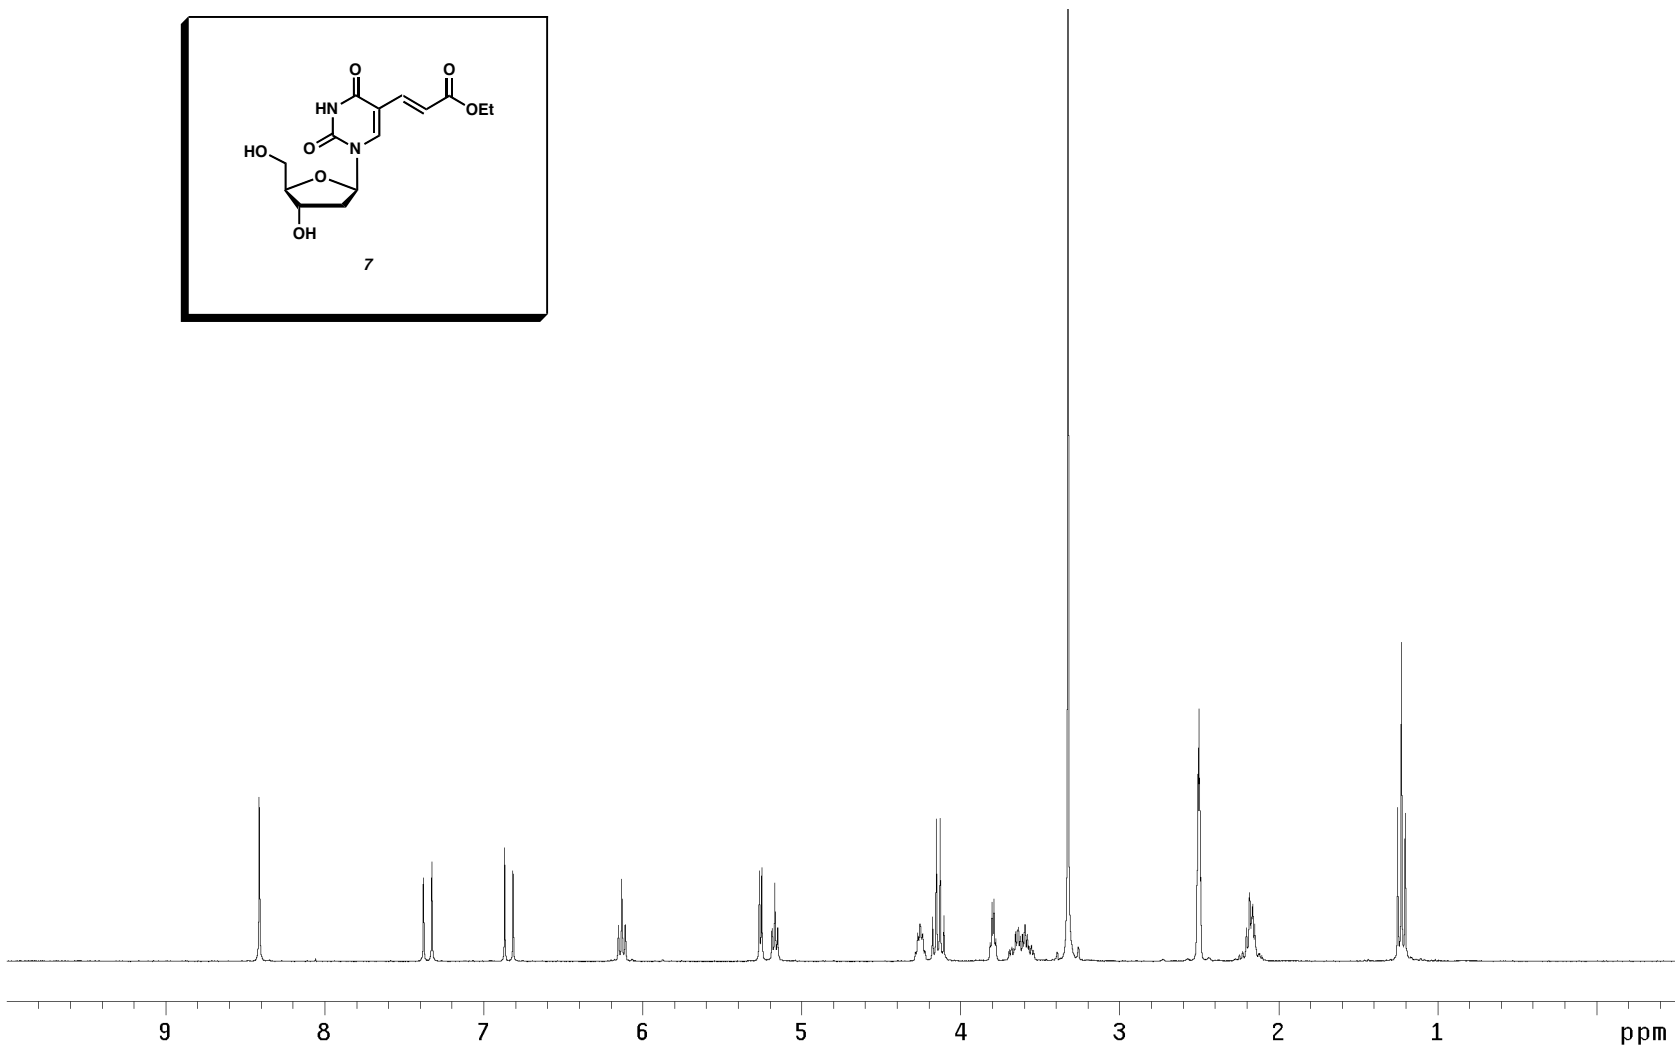

Figure SI.9  $^1\text{H}$  NMR (300 MHz,  $\text{DMSO-}d_6$ ) of compound **7**.<sup>2m,n</sup>

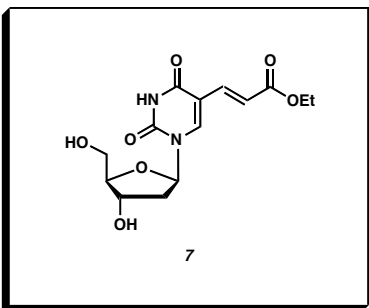

**References:**

- 1 E. J. Trybulski, J. Zhang, R. H. Kramss and R. M. Mangano, *J. Med. Chem.*, 1993, **36**, 3533.
  
- 2 For previous syntheses, see: (a) F. W. Hobbs, *J. Org. Chem.*, 1989, **54**, 3420. (b) A. L. Casalnuovo and J. C. Calabrese, *J. Am. Chem. Soc.*, 1990, **112**, 4324. (c) T. R. Battersby, D. N. Ang, P. Burgstaller, S. C. Jurczyk, M. T. Bowser, D. D. Buchanan, R. T. Kennedy and S. A. Benner, *J. Am. Chem. Soc.*, 1999, **121**, 9781. (d) S. E. Lee, J. S. Vyle, D. M. Williams and J. A. Grasby, *Tetrahedron Lett.*, 2000, **41**, 267. (e) S. A. Benner, U.S. Patent 5,965,364, 1999. (f) P. V. Fisher, P. Vatta and S. H. Khan, PCT Int. Appl. WO 9818466, 2003. (g) J. M. Prober, R. J. Dam, C. W. Robertson, Jr., F. W. Hobbs, Jr. and G. L. Trainor, Eur. Pat. Appl. EP 252683, 1988. (h) P. N. Confalong, *J. Heterocycl. Chem.*, 1990, **27**, 31. (i) G. G.-Y. Shen and T. S. Dobashi, U.S. Patent 6,002,003, 1999. (j) K. J. Gibson and S. J. Benkovic, *Nuc. Acid. Res.*, 1987, **15**, 6455. (k) J. C. Tabone, M. R. Stamm, H. B. Gamper and R. B. Meyer, Jr., *Biochemistry*, 1994, **33**, 375. (l) F. Seela, N. Ramzeva, P. Leonard, Y. Chem, H. Debelak, E. Feiling, R. Kroeschel, M. Zulauf, T. Wenzel, T. Froehlich and M. Kostrzewa, *Nucleosides Nucleotides*, 2001, **20**, 1421. (m) A. S. Jones, G. Verhelst and R. T. Walker, *Tetrahedron Lett.*, 1979, **20**, 4415. (n) H. Griengl, W. Hayden, W. Schwarz, H. Bachmayer and B. Rosenwirth, *Eur. J. Med. Chem. Chim. Ther.*, 1985, **20**, 105.
